# Supplementary material
Source: publisher site journal article supplement (https://www.spandidos-publications.com/1761/downloadSupplementary)
Supplement: Supplementary file 1 [file downloadSupplementary]

## Sheet: sorted_otu_table_L6
Table SIII. Percentage abundance of bacteria detected in tear fluids.
Taxon					Subject ID
Phylum	Class	Order	Family	Genus	CL-I				CL-II	CL-III			Healthy
					2	7	8	9	5	3	4	6	10	11	12	13	14	15
Other	Other	Other	Other	Other	0.36579	0.587208	0.296891	0.443696	0.019497	0.202634	0.0187021	0.030125	0	0	0.78125	0	0	0.0381825
Actinobacteria	Actinobacteria	Actinomycetales	Actinomycetaceae	Actinobaculum	0	0	1.48446	1.26989	0	0	0	0	0	0	0	0	0	0
Actinobacteria	Actinobacteria	Actinomycetales	Actinomycetaceae	Actinomyces	1.16704	2.58689	1.71149	1.74419	0	2.9382	0.243127	0.316313	0.141168	0.390348	0	0	0	0
Actinobacteria	Actinobacteria	Actinomycetales	Actinomycetaceae	Mobiluncus	0	0	0	0	0	0	0.187021	0	0	0	0	0	0	0
Actinobacteria	Actinobacteria	Actinomycetales	Corynebacteriaceae	Corynebacterium	14.1961	2.44406	2.54977	0	0	6.68693	7.51823	1.34056	0	0	0	0	0.957049	0
Actinobacteria	Actinobacteria	Actinomycetales	Dermacoccaceae	Dermacoccus	0.574813	0	0	0	0	0	0	0	0	0	0	0	0	0
Actinobacteria	Actinobacteria	Actinomycetales	Microbacteriaceae		0	0.0158705	0.0174642	0	0	0	0	0	0	0	0	0	0	0
Actinobacteria	Actinobacteria	Actinomycetales	Microbacteriaceae	Cryocola	0	0	0.0174642	0	0	0	0	0	0	0.0177431	0	0	0	0
Actinobacteria	Actinobacteria	Actinomycetales	Microbacteriaceae	Leucobacter	0	0.682431	0.646175	0.229498	0	0	0	0	0	2.20014	0	0.798722	0	0.0381825
Actinobacteria	Actinobacteria	Actinomycetales	Microbacteriaceae	Microbacterium	0.139349	0	0	0.0305998	0	0	0	0	0	0.0354862	0	0	0	1.5273
Actinobacteria	Actinobacteria	Actinomycetales	Micrococcaceae		0	0	0.0349284	0	0	0	0	0	0	0	0.0236742	0	0	0
Actinobacteria	Actinobacteria	Actinomycetales	Micrococcaceae	Nesterenkonia	0	0	0	0	0	0	0	0	0	0	0	0	0	1.06911
Actinobacteria	Actinobacteria	Actinomycetales	Micrococcaceae	Renibacterium	0.470301	0	1.08278	0	1.65724	0	0	0	1.74696	0	0.591856	2.10863	0	0
Actinobacteria	Actinobacteria	Actinomycetales	Micrococcaceae	Rothia	1.74186	3.69783	4.75026	3.50367	0.83837	0	0.523658	0.0150625	1.44697	1.95174	3.38542	1.69329	0.303455	0
Actinobacteria	Actinobacteria	Actinomycetales	Micromonosporaceae	Other	0.435464	0	0	0	0	0	0	0	0	0	0	0	0	0
Actinobacteria	Actinobacteria	Actinomycetales	Nocardiaceae	Nocardia	0	0	0	0	0	0	0	0	0	0	0.591856	0	0	0
Actinobacteria	Actinobacteria	Actinomycetales	Propionibacteriaceae	Propionibacterium	4.99913	2.03142	2.8292	4.88066	0	22.8977	0.486254	0	0	0	2.58049	0	0.326797	0.840015
Actinobacteria	Actinobacteria	Bifidobacteriales	Bifidobacteriaceae	Bifidobacterium	0.278697	0	0	0	0	0	0	0	0	0	0	0	0	0
Actinobacteria	Coriobacteriia	Coriobacteriales	Coriobacteriaceae	Atopobium	0	0.412633	0	0	0.116982	0	0	0	0	0	0	0	0	0
Bacteroidetes	Bacteroidia	Bacteroidales	Bacteroidaceae	Bacteroides	0	0.761784	0	0	0	0	0	0.0150625	0	0.0177431	0.0236742	0	0.0233427	0
Bacteroidetes	Bacteroidia	Bacteroidales	Porphyromonadaceae	Porphyromonas	3.90176	0.983971	2.41006	2.92228	0	1.01317	2.88012	0.692875	0	0	0	2.42812	0	0
Bacteroidetes	Bacteroidia	Bacteroidales	Prevotellaceae	Prevotella	2.97858	8.17331	1.74642	4.20747	0	13.0699	2.22555	0	0.599965	0.0177431	0.970644	0.0319489	1.77404	0
Bacteroidetes	Bacteroidia	Bacteroidales	Rikenellaceae		0	0	0	0	0	0	0	0.0150625	0.017646	0	0	0	0	0
Bacteroidetes	Bacteroidia	Bacteroidales	S24-7		0	0	0	0	0.0779879	0.202634	0	0.0150625	0	0.0354862	0	0.0638978	0.0233427	0
Bacteroidetes	Bacteroidia	Bacteroidales	[Paraprevotellaceae]	[Prevotella]	0	1.34899	0	2.53978	0	0	0	0	0	0	0	0	0	0.0381825
Bacteroidetes	Flavobacteriia	Flavobacteriales	Flavobacteriaceae		0	0	0	0	0	0	0	0	0	0	0	0	0.396825	0
Bacteroidetes	Flavobacteriia	Flavobacteriales	Flavobacteriaceae	Capnocytophaga	0	0	0	0.780294	1.85221	0	0	0	0	0	0	0	0	0
Bacteroidetes	Flavobacteriia	Flavobacteriales	Flavobacteriaceae	Flavobacterium	0.661906	0	0	0	0	0	0	0	0	0	0	0	0	0
Bacteroidetes	Flavobacteriia	Flavobacteriales	[Weeksellaceae]	Chryseobacterium	0	0	0	0	0	0	0.0561062	0	0	0	1.08902	0	0	0
Bacteroidetes	[Saprospirae]	[Saprospirales]	Chitinophagaceae		0	0	0	0	0	0	0	0	0.794071	0	0	0	0	0
Cyanobacteria	4C0d-2	YS2			0	0	0	0	0	0	0	0	0	4.22285	0	0	0	0
Firmicutes	Bacilli	Other	Other	Other	0	0	0	0.0305998	0	0	0	0	0	0	0	0	0	0
Firmicutes	Bacilli	Bacillales	Other	Other	0	0	0	0.0458996	0	0	0	0	0	0	0	0	0	0
Firmicutes	Bacilli	Bacillales	Bacillaceae	Other	0	0	0	1.33109	2.06668	0	0	0.888688	1.19993	0.479063	0.733902	0	0	0.649103
Firmicutes	Bacilli	Bacillales	Bacillaceae		0	0	0	0.0305998	1.32579	0	0.710679	0	0	0	0.0236742	0	0	0
Firmicutes	Bacilli	Bacillales	Bacillaceae	Bacillus	0	0	0.628711	0.566095	0.721388	0.911854	0	2.36481	0.635257	1.75656	1.39678	0	0	0.0381825
Firmicutes	Bacilli	Bacillales	Paenibacillaceae	Brevibacillus	0	0.396762	0	0	0	0	0	0	0	0	0	0	0	0
Firmicutes	Bacilli	Bacillales	Planococcaceae		0	0	0	0.0458996	0	0	0	0	0	0	0	0	0	0
Firmicutes	Bacilli	Bacillales	Planococcaceae	Lysinibacillus	0.505138	0	0	0	0	0	0	0	0	0	0	0	0	0
Firmicutes	Bacilli	Bacillales	Staphylococcaceae	Staphylococcus	0.940603	0.555467	0.244499	2.43268	0	0	0	0	1.05876	0.0354862	0.733902	0	0	0
Firmicutes	Bacilli	Bacillales	[Thermicanaceae]	Thermicanus	0	0	0	0	0	2.9382	0.280531	0	0	0	0	0	0	0
Firmicutes	Bacilli	Gemellales	Gemellaceae		3.53597	2.14252	3.10863	4.83476	0	5.77508	0.561062	0	1.04112	0.0177431	1.72822	0	0	0
Firmicutes	Bacilli	Gemellales	Gemellaceae	Gemella	0.452883	0	0	0	0	0	0	0	0	0	0	0	0	0
Firmicutes	Bacilli	Lactobacillales	Other	Other	0.0348371	0.0476115	0	0	0	0	0	0	0	0	0.0236742	0	0	0.0190913
Firmicutes	Bacilli	Lactobacillales	Carnobacteriaceae	Granulicatella	2.29925	2.53928	1.55431	2.64688	0.0974849	0	0.467552	0	0.882301	0	0.118371	0.0319489	0	0
Firmicutes	Bacilli	Lactobacillales	Enterococcaceae	Vagococcus	0.0522557	0.0158705	0	0.0611995	0	0	0	0	0	0	0	0	0	0
Firmicutes	Bacilli	Lactobacillales	Lactobacillaceae	Lactobacillus	0	0	0	0	0.44843	3.5461	0.0561062	0.225938	0.105876	0.212917	0.0473485	0.607029	0.116713	0.248186
Firmicutes	Bacilli	Lactobacillales	Streptococcaceae		0.0348371	0.0476115	0.0174642	0.0152999	0	0	0	0	0	0.0354862	0	0	0	0.0190913
Firmicutes	Bacilli	Lactobacillales	Streptococcaceae	Streptococcus	14.2658	17.7591	17.0975	26.9584	0	11.2462	1.12212	2.15394	4.79972	1.63236	3.36174	1.85304	1.54062	0.878198
Firmicutes	Bacilli	Turicibacterales	Turicibacteraceae	Turicibacter	0	0	0	0	0.0584909	0.303951	0.0187021	0	0	0.0177431	0	0.0319489	0	0.0190913
Firmicutes	Clostridia	Clostridiales			0.139349	0	0	0	0.038994	0	0.0187021	0.030125	0	0.0177431	0	0.0958466	0.0233427	0.0190913
Firmicutes	Clostridia	Clostridiales	Clostridiaceae	Clostridium	0	0.0476115	2.04331	0	0	0	0	0	3.37039	0	0	0	0	0
Firmicutes	Clostridia	Clostridiales	Lachnospiraceae	Other	0	0	0	0	2.14467	0	0	0	0	0	0	0	0	0
Firmicutes	Clostridia	Clostridiales	Lachnospiraceae		0.539976	0.0793525	0	1.30049	0	0	0	0.0150625	0.035292	0	0	0	0.0233427	0
Firmicutes	Clostridia	Clostridiales	Lachnospiraceae	Coprococcus	0	0	0	0	0.0584909	0	0	0	0	0	0	0	0	0
Firmicutes	Clostridia	Clostridiales	Lachnospiraceae	Oribacterium	1.16704	0	0.261963	0.260098	0	0	0	0	0	0.248403	0.307765	0	0	0
Firmicutes	Clostridia	Clostridiales	Peptococcaceae	Desulfosporosinus	0.627068	0	0	0	0	0	0	0	0	0	0	0	0	0
Firmicutes	Clostridia	Clostridiales	Peptococcaceae	Peptococcus	0	0	0.960531	0.673195	0	0	0	0	0	0	0	0	0	0
Firmicutes	Clostridia	Clostridiales	Peptostreptococcaceae	Peptostreptococcus	0.278697	0	0	0	0	0	0	0	2.11752	0.0177431	0	0	0	0
Firmicutes	Clostridia	Clostridiales	Ruminococcaceae		0	0	0	0	0	0	0.0187021	0	5.66437	0	0	0	0	0.0190913
Firmicutes	Clostridia	Clostridiales	Ruminococcaceae	Ruminococcus	0	0	0	0	0	0	0	0	0	0.0177431	0	0.0319489	0	0
Firmicutes	Clostridia	Clostridiales	Veillonellaceae	Dialister	0	0	0	0	0	0	0	0	0.299982	0	0	0	0	0
Firmicutes	Clostridia	Clostridiales	Veillonellaceae	Megamonas	0	0.507856	0	0	0	0	0	0	0	0	0	0	0	0
Firmicutes	Clostridia	Clostridiales	Veillonellaceae	Megasphaera	0.156767	0	0	0.397797	0	0	0	0	0	0	0	0	0	0
Firmicutes	Clostridia	Clostridiales	Veillonellaceae	Selenomonas	0.48772	0	0	0	0	0	0	0	0	0	0	0	0	0
Firmicutes	Clostridia	Clostridiales	Veillonellaceae	Veillonella	1.55025	4.49135	3.63255	1.02509	1.18932	0	0	1.12969	1.5705	0	1.44413	0	0	0.439099
Firmicutes	Clostridia	Clostridiales	[Mogibacteriaceae]	Mogibacterium	0.0348371	0	0	0	0	0	0	0	0.0529381	0	0	0	0	0
Firmicutes	Clostridia	Clostridiales	[Tissierellaceae]	1-68	0	0	0	0	0	0	0	0	0	4.40028	0	4.08946	0	3.47461
Firmicutes	Clostridia	Clostridiales	[Tissierellaceae]	Anaerococcus	0.679324	0	0	0	0	0	0	0	0	0	0	0	0	0
Firmicutes	Clostridia	Clostridiales	[Tissierellaceae]	Parvimonas	0	1.14268	0	1.11689	0	0	0	0	0	0	0	0	0	0
Firmicutes	Clostridia	Clostridiales	[Tissierellaceae]	WAL_1855D	0	0	0	0	0	0	0	0	0	0	0	0	3.36134	0
Firmicutes	Clostridia	Clostridiales	[Tissierellaceae]	ph2	0	0	0	0	0	0	0	0	0	0	0	1.53355	0	0
Firmicutes	Erysipelotrichi	Erysipelotrichales	Erysipelotrichaceae	Allobaculum	0	0	0	0	0	0.202634	0.0187021	0	0	0.0177431	0	0.0319489	0	0
Firmicutes	Erysipelotrichi	Erysipelotrichales	Erysipelotrichaceae	Bulleidia	0	0	0	0	0	0	0	0	1.74696	0	0	0	0	0
Fusobacteria	Fusobacteriia	Fusobacteriales	Fusobacteriaceae	Fusobacterium	1.498	2.57102	1.97345	2.18788	0	0	0	0	0	0	0	0	0	0
Fusobacteria	Fusobacteriia	Fusobacteriales	Leptotrichiaceae	Leptotrichia	0.261279	0	0	0.657895	0	0	0	0	0	4.84386	0	0	0	0
OD1	ZB2				0	0	0	0	0	0.101317	3.06714	0.195813	0	0.124202	1.30208	0	0	1.01184
Proteobacteria	Alphaproteobacteria				0.818673	0.872877	0	0	0	0	0	0	3.58214	0	3.59848	0.0319489	2.21755	0
Proteobacteria	Alphaproteobacteria	Caulobacterales	Caulobacteraceae		0	0	0	0	0	0	0	0	0	0	0.260417	0	0	0
Proteobacteria	Alphaproteobacteria	Rhizobiales			0.191604	0.428503	0	0	0	0	0	0	3.47627	1.11781	0	0	0.746965	2.21459
Proteobacteria	Alphaproteobacteria	Rhizobiales	Aurantimonadaceae		0.522557	0	0	0	0	0	0	0	0	0	0	0	0	0
Proteobacteria	Alphaproteobacteria	Rhizobiales	Bradyrhizobiaceae		0	0.920489	0	0	0	0	0	0	0	2.60823	0	1.62939	0	1.7373
Proteobacteria	Alphaproteobacteria	Rhizobiales	Brucellaceae	Ochrobactrum	0	0.0158705	2.68949	0	0	0	3.89003	2.19913	0	0.514549	0.213068	0	0.0233427	2.38641
Proteobacteria	Alphaproteobacteria	Rhizobiales	Methylobacteriaceae	Methylobacterium	1.2193	1.25377	0	0.826193	0.155976	0	1.34655	1.94306	0	0	0.899621	1.66134	2.19421	4.12371
Proteobacteria	Alphaproteobacteria	Rhizobiales	Phyllobacteriaceae	Other	0.435464	0.444374	2.56724	0.275398	0	0	3.16065	0	0	1.96948	0.0473485	0	2.54435	1.60367
Proteobacteria	Alphaproteobacteria	Rhizobiales	Phyllobacteriaceae		0.0522557	0.0476115	0.0698568	0	0	0	0.0748083	0	0	0.212917	0	0.0319489	0.210084	0.0954563
Proteobacteria	Alphaproteobacteria	Rhizobiales	Phyllobacteriaceae	Aminobacter	0	0	0.0523926	0	0	0	0	0	0	0.0177431	0	0.86262	0.186741	0.114548
Proteobacteria	Alphaproteobacteria	Rhizobiales	Phyllobacteriaceae	Phyllobacterium	1.86379	4.03111	11.928	3.16707	9.24157	0	8.22891	17.5779	9.07005	14.1412	9.65909	21.3738	4.59851	15.2921
Proteobacteria	Alphaproteobacteria	Rhizobiales	Rhizobiaceae	Agrobacterium	0	0	3.5627	0.734394	3.50946	0	0.54236	8.64588	5.48791	3.74379	1.42045	3.16294	7.72642	2.53914
Proteobacteria	Alphaproteobacteria	Rhizobiales	Rhizobiaceae	Rhizobium	0.296116	0	0	0	0	0	2.22555	0	0	0	2.50947	1.75719	0	2.34822
Proteobacteria	Alphaproteobacteria	Rhizobiales	Rhizobiaceae	Shinella	0	0	0	0	0	0	0	0	0	0	0.0236742	0	0	0.0190913
Proteobacteria	Alphaproteobacteria	Sphingomonadales	Other	Other	0	0	0.0349284	0	0	0	0	0.0150625	0	0	0.0236742	0	0.0466853	0.0190913
Proteobacteria	Alphaproteobacteria	Sphingomonadales	Erythrobacteraceae		0	0	0	0	0	0	0.0187021	0.030125	0.017646	0.0354862	0.378788	0.0319489	0.0466853	0.171821
Proteobacteria	Alphaproteobacteria	Sphingomonadales	Sphingomonadaceae	Sphingomonas	8.7267	15.4261	10.985	8.46083	65.7828	0	41.3316	38.4094	38.3448	39.7977	37.5473	44.5367	51.7274	46.1817
Proteobacteria	Betaproteobacteria	Burkholderiales	Burkholderiaceae	Lautropia	0	0	0	0	0	0	0.224425	0	0	0	0	0	0	0
Proteobacteria	Betaproteobacteria	Burkholderiales	Comamonadaceae	Other	0	0.0158705	0.0523926	0	0.331449	0	0.168319	0.391625	0	0.0177431	0.307765	0.191693	0.0233427	0.0190913
Proteobacteria	Betaproteobacteria	Burkholderiales	Comamonadaceae		0.0348371	0.0158705	0	0	0.428934	0	1.8328	0.587438	1.25287	0	3.69318	0.734824	0	0.0190913
Proteobacteria	Betaproteobacteria	Burkholderiales	Comamonadaceae	Comamonas	0	0	0	0	0.019497	0	0.0187021	0	0.017646	0.0354862	0.118371	0	0	0
Proteobacteria	Betaproteobacteria	Burkholderiales	Comamonadaceae	Delftia	2.247	1.30138	2.88159	1.72889	1.32579	1.51976	2.59959	8.88688	2.15281	4.80837	3.10133	2.10863	2.63772	5.17373
Proteobacteria	Betaproteobacteria	Burkholderiales	Oxalobacteraceae		0	0	0	0	0	0	0	0	0	0	0	0	0.606909	0
Proteobacteria	Betaproteobacteria	Burkholderiales	Oxalobacteraceae	Janthinobacterium	0.296116	0	0	0	0	0	0	0	0	0	0	0	0	0
Proteobacteria	Betaproteobacteria	Neisseriales	Neisseriaceae	Other	0	0.0158705	0	0.0152999	0	0	0	0	0	0.0177431	0	0	0	0
Proteobacteria	Betaproteobacteria	Neisseriales	Neisseriaceae		0.435464	0	0	0	0	0	0.299233	0	0	0	0	0	0	0
Proteobacteria	Betaproteobacteria	Neisseriales	Neisseriaceae	Neisseria	4.3198	4.55483	1.04785	4.86536	0	13.4752	0.280531	0	0.423504	2.64372	1.01799	0	2.12418	0
Proteobacteria	Betaproteobacteria	Rhodocyclales	Rhodocyclaceae		0	0	0	0	0	0	0	0	0.017646	0.0177431	0.0236742	0	0	0
Proteobacteria	Deltaproteobacteria	Desulfovibrionales	Desulfovibrionaceae		0	0	0	0	0.038994	0.101317	0.0374042	0.030125	0.017646	0	0	0.0319489	0	0
Proteobacteria	Epsilonproteobacteria	Campylobacterales	Campylobacteraceae	Campylobacter	0	1.28551	0	0	0	0	0	0	0	0	0	0	0	0
Proteobacteria	Epsilonproteobacteria	Campylobacterales	Helicobacteraceae	Other	0	0	0	0	0	0	0.0187021	0	0.017646	0	0	0	0	0
Proteobacteria	Gammaproteobacteria	Aeromonadales	Aeromonadaceae		0.505138	0	0	0	0	0	0	0	0	0	0	0	0	0
Proteobacteria	Gammaproteobacteria	Enterobacteriales	Enterobacteriaceae		0.400627	1.15855	1.23996	0.826193	0	0	0	0	0	0.266146	0.662879	0	0	1.7373
Proteobacteria	Gammaproteobacteria	Oceanospirillales	Halomonadaceae	Halomonas	0	0	0	0	0	0	0	0	0	1.47268	0	0	2.35761	0
Proteobacteria	Gammaproteobacteria	Pasteurellales	Pasteurellaceae	Aggregatibacter	0	0	0.995459	0	1.9497	0	0	0	0	0	0	0	0	0
Proteobacteria	Gammaproteobacteria	Pasteurellales	Pasteurellaceae	Haemophilus	0.836091	5.14204	4.41844	4.05447	0	6.07903	0	1.64181	1.23522	0	0.899621	0	0	0
Proteobacteria	Gammaproteobacteria	Pseudomonadales	Moraxellaceae	Acinetobacter	0.209023	0	0	0	0.526418	0	9.68768	0	0.388212	0	0	0.926518	0	0
Proteobacteria	Gammaproteobacteria	Pseudomonadales	Moraxellaceae	Enhydrobacter	4.28497	0	0	0.413097	0	0	0	0	0	0	0	0	0	0
Proteobacteria	Gammaproteobacteria	Pseudomonadales	Pseudomonadaceae	Other	0	0	0.0349284	0	0	0	0	0	0	0	0	0	0	0
Proteobacteria	Gammaproteobacteria	Pseudomonadales	Pseudomonadaceae	Pseudomonas	0.418046	0.857007	0.750961	0	0	0	0	0	0	0	0	0.223642	0.070028	0.630011
Proteobacteria	Gammaproteobacteria	Vibrionales	Pseudoalteromonadaceae	Pseudoalteromonas	0	0	0	0	0	0	0.187021	0	0.635257	0	0	0	0	0
Proteobacteria	Gammaproteobacteria	Xanthomonadales	Xanthomonadaceae	Other	0.0174186	0.0158705	0	0	0	0	0	0	0	0.0177431	0.0236742	0	0	0
Proteobacteria	Gammaproteobacteria	Xanthomonadales	Xanthomonadaceae		1.88121	0.555467	0.506462	0.611995	0.038994	5.87639	0.0374042	0.241	0.105876	0.69198	0.260417	2.71565	0.326797	0.0190913
Proteobacteria	Gammaproteobacteria	Xanthomonadales	Xanthomonadaceae	Dokdonella	0	0.031741	0	0	0	0	0	0	0	0	0	0	0	0
Proteobacteria	Gammaproteobacteria	Xanthomonadales	Xanthomonadaceae	Dyella	0	0	0	0.0305998	0	0	0	0	0	0	0	0	0	0
Proteobacteria	Gammaproteobacteria	Xanthomonadales	Xanthomonadaceae	Rhodanobacter	7.33322	3.26932	2.16556	3.94737	0	0	0	0	0	0.780696	0	0	0	0
Proteobacteria	Gammaproteobacteria	Xanthomonadales	Xanthomonadaceae	Stenotrophomonas	0.870928	1.30138	2.91652	0.872093	3.8604	0	3.29157	9.92619	2.6469	1.38396	12.0502	2.55591	10.7143	3.11187
SR1					0	0	0	0	0	0	0	0	1.74696	0	0	0	0	0
TM7	TM7-3				0.330953	0.9681	0	0	0	0.607903	0	0	0	0	0	0	0	0
Tenericutes	Mollicutes	Mycoplasmatales	Mycoplasmataceae		0	0	0	0	0.0779879	0.303951	0.0187021	0.030125	0.035292	0.0177431	0	0	0	0.0572738
[Thermi]	Deinococci	Deinococcales	Deinococcaceae	Deinococcus	0	0	0	0	0	0	0	0	0	0.904897	0	0	0	0
